# Supplementary material for: Reprogramming of macrophages with macrophage cell membrane-derived nanoghosts
Source: Royal Society of Chemistry journal article supplement (doi:10.1039/d0na00572j), 2020-01-01
Supplement: d0na00572j1.pdf [file d0na00572j1.pdf]

## Supporting Information

### Reprogramming of macrophages with macrophage cell membrane-derived nanoghosts

*Jangsun Hwang<sup>1</sup>, Mengjia Zheng<sup>1</sup>, Christian Wiraja<sup>1</sup>, Mingyue Cui<sup>1</sup>, Lixia Yang<sup>1</sup>, Chenjie*

*Xu<sup>1,2,3\*</sup>*

<sup>1</sup> School of Chemical and Biomedical Engineering, Nanyang Technological University, Singapore  
637457

<sup>2</sup> National Dental Centre of Singapore, 5 Second Hospital Ave, 168938, Singapore

<sup>3</sup> Department of Biomedical Engineering, City University of Hong Kong, 83 Tat Chee Avenue,  
Kowloon, Hong Kong SAR, China

\* Correspondence to [chenjie.xu@cityu.edu.hk](mailto:chenjie.xu@cityu.edu.hk)

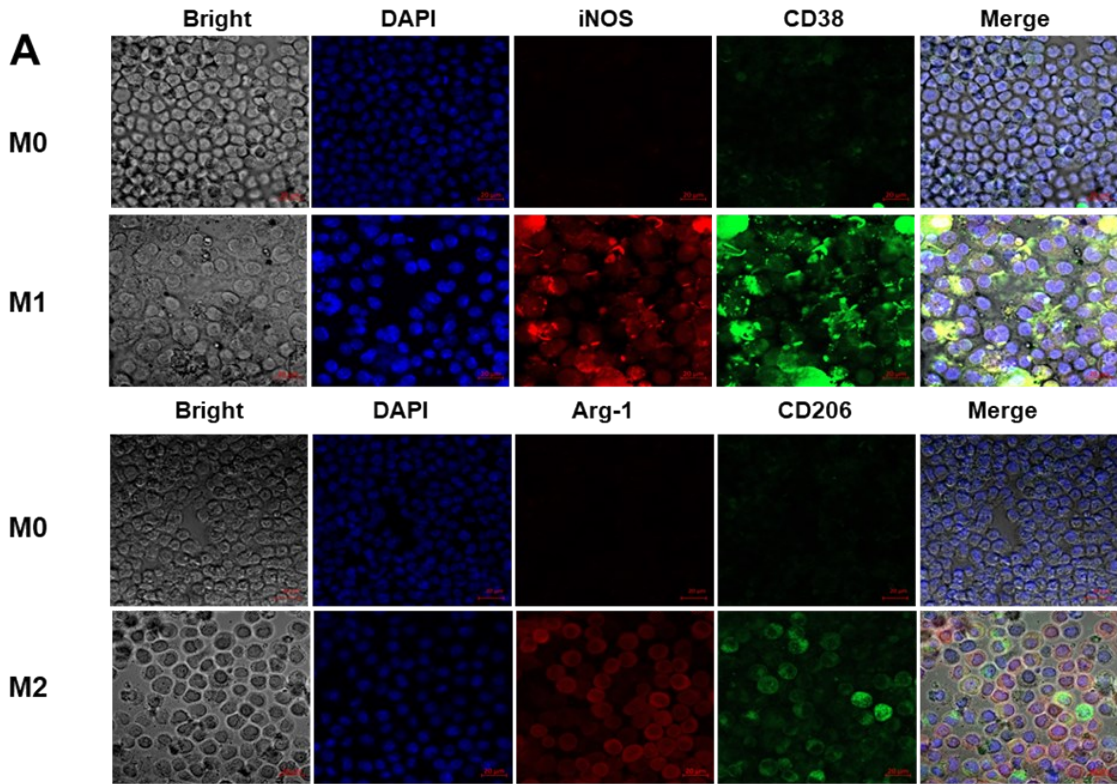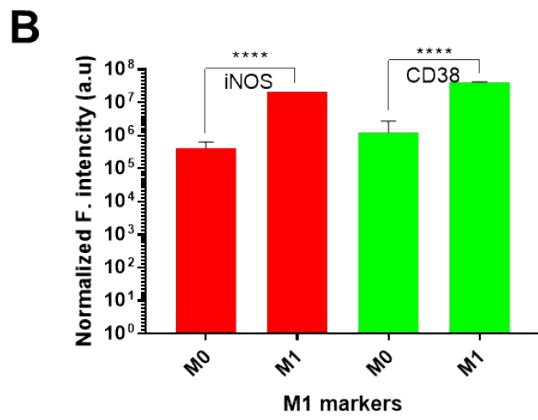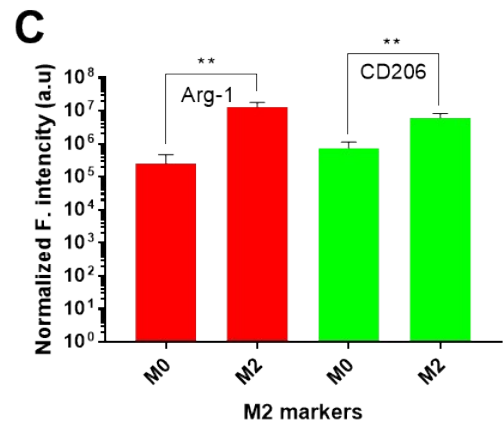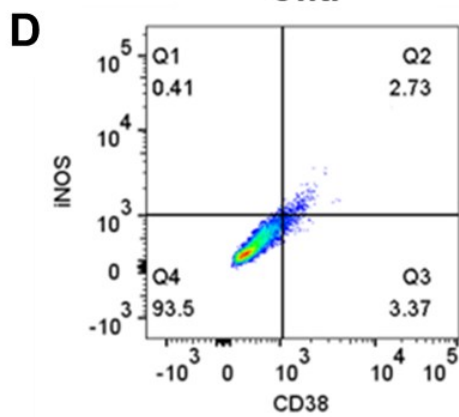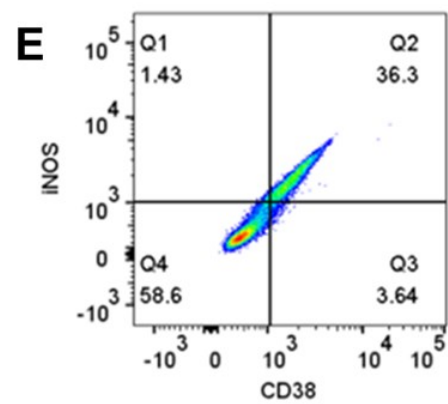

**Supplementary Figure 1.** Polarization of J744A1 macrophages. (A) Immunofluorescence staining of M1 and M2 macrophages. Cells were stained with Anti-CD38 antibody (Green) and Anti-iNOS antibody (Red) for M1, Anti-CD206 antibody (Green), Anti-Arg-1 antibody (Red) for M2. Scale bar=20  $\mu$ m. (B) Quantification of iNOS and CD38 expression on M1 macrophages. (C) Quantification of Agr-1 and CD206 expression on M2 macrophages. \*\*P<0.01, \*\*\*\*P<0.0001. (D) FACS analysis of M0 macrophages with M1 makers. (E) FACS analysis of M1 polarized macrophages with M1 makers (M1 markers: PE- iNOS, FITC-CD38).

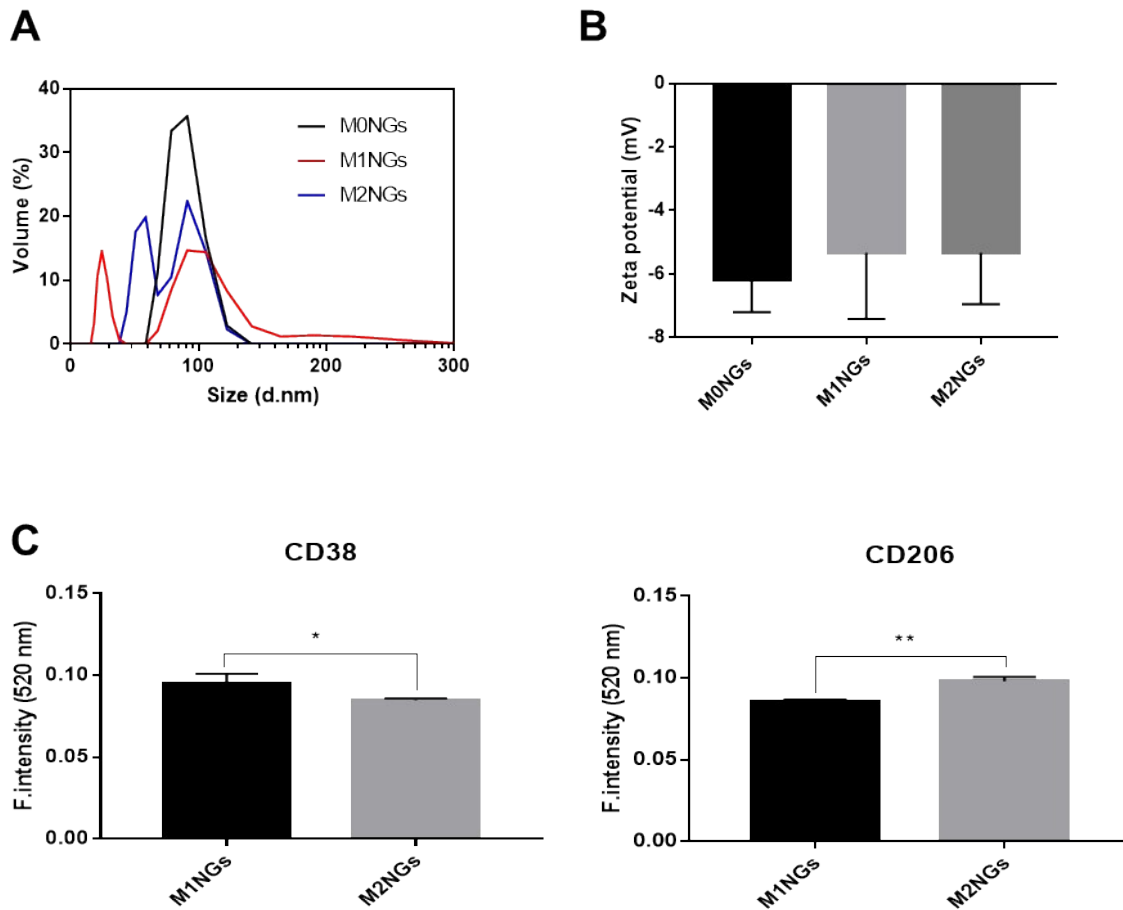

**Supplementary Figure 2.** Characterization of nanoghosts derived from RAW 264.7 macrophages. (A) Hydrodynamic diameters. (B) Zeta potential of nanoghosts. Comparison of (C) CD38 and (D) CD206 expression on nanoghosts derived from M1 or M2 macrophages. \*P<0.05, \*\*P<0.001

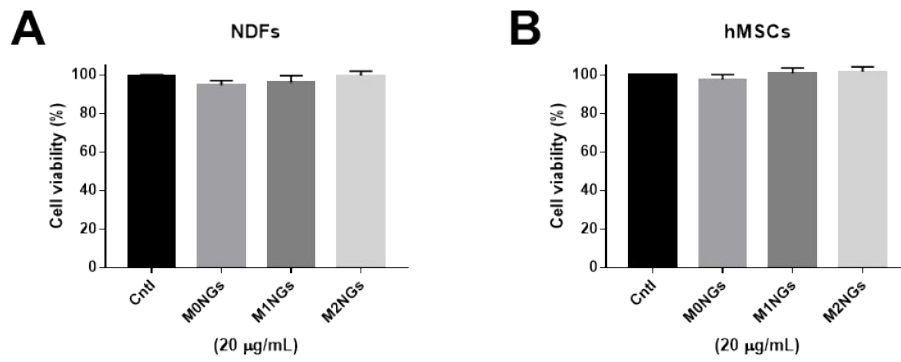

**Supplementary Figure 3.** Cytotoxicity of nanoghosts derived from M0, M1, and M2 Raw 264.7 macrophages. 20 µg/mL of nanoghosts against (A) NDFs and (B) hMSCs.

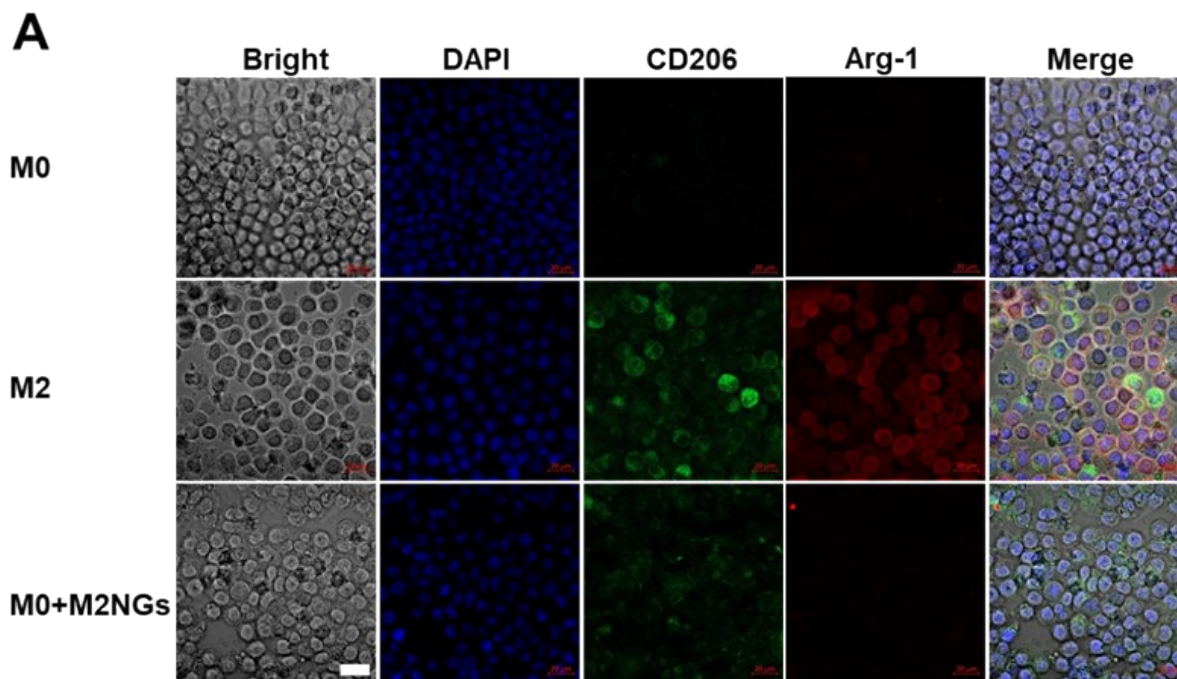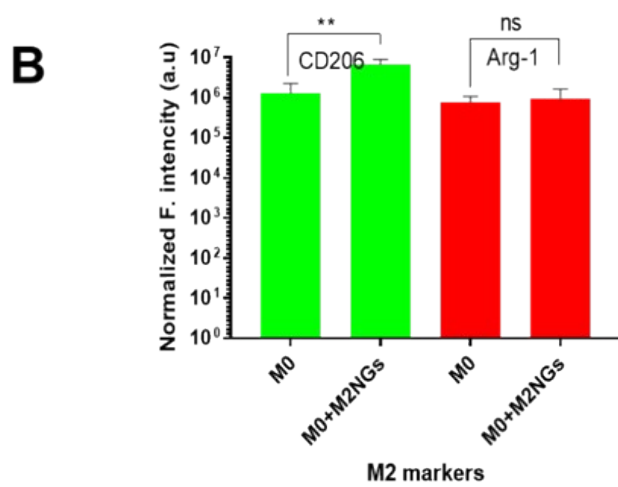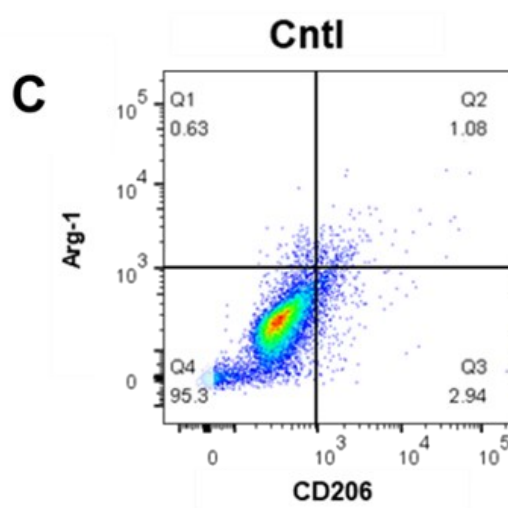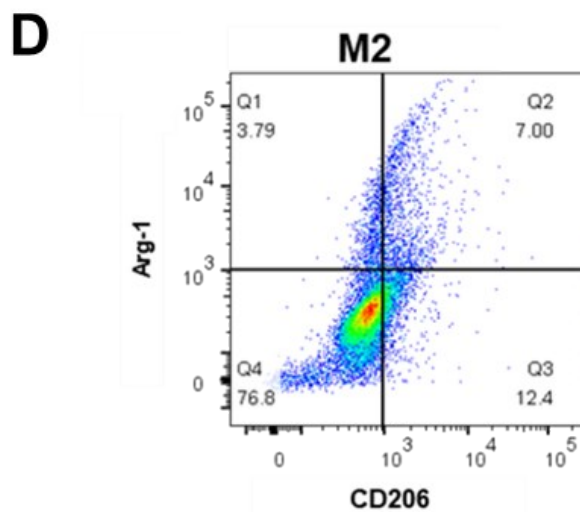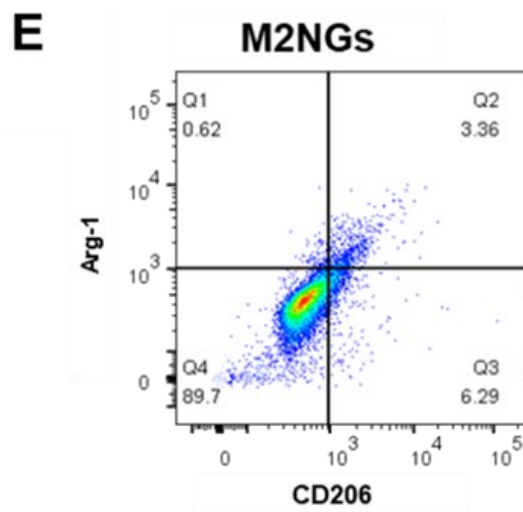

**Supplementary Figure 4.** Reprogrammed J744A1 macrophages (A) Confocal images of J744A1 macrophages (CD206: Green, Arg-1: Red, Scale bar is 20  $\mu$ m). (B) Quantification of M2 markers expression (\*P<0.05, \*\*P<0.01, \*\*\*P<0.001.) (C) FACS analysis of macrophages as control. (D) FACS analysis of M2 polarized macrophages by cytokines. (E) FACS analysis of reprogrammed macrophages by M2NGs (M2 markers: CD206 and Arg-1).

Comment [XC(P)]: Scale bar in A can not be seen.

Font in B-E is away too small compared with that in A.

Suggest to re-arrange images

A  
BC  
DE.

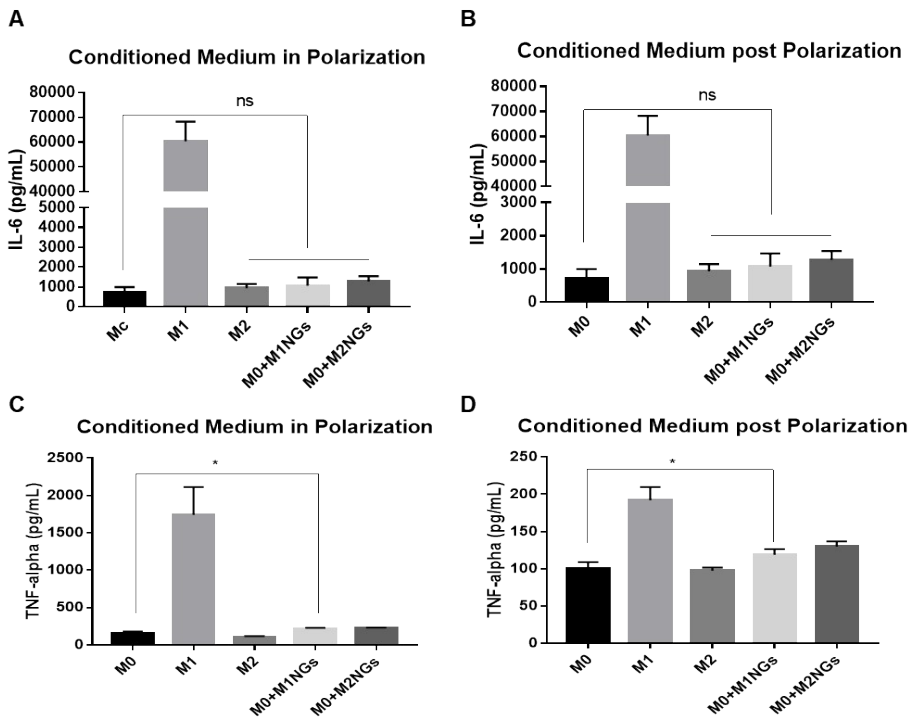

**Supplementary Figure 5.** ELISA analysis of cytokines (IL-6, TNF-  $\alpha$ ) in the conditioned media from M0, M1, M2 macrophages and M0 macrophages-treated with M1NGs and M2NGs (A, C) at the 4<sup>th</sup> day of polarization. Conditioned media post polarization at day 2 post the medium replacement (B, D). (ns=no Significant, \*P<0.05).

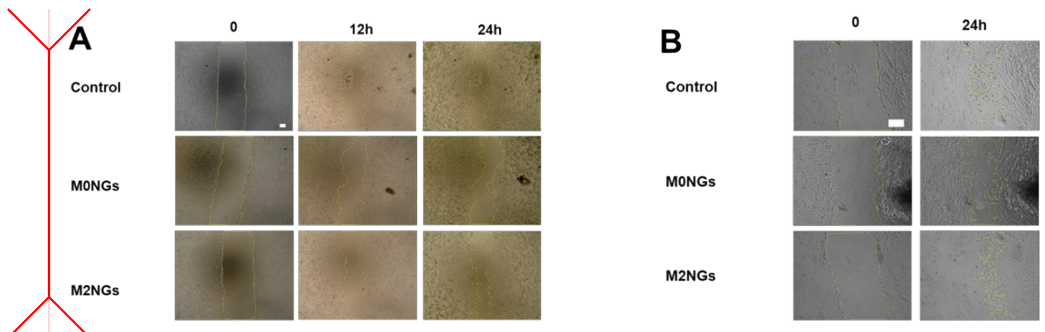

Comment [XC(P)]: Indicate A and B in figure

**Supplementary Figure 6.** Reprogramming macrophages with nanoghosts in scratch assay. **(A)** Representative phase-contrast images of wounded NIH-3T3 mouse fibroblasts cocultured with Raw 264.7. **(B)** Representative phase-contrast images of wounded NDFs human fibroblasts cocultured with Raw 264.7.
